# Supplementary material for: Investigating the Structural Evolution and Catalytic Activity of c-Co/Co3Mo Electrocatalysts for Alkaline Hydrogen Evolution Reaction
Source: MDPI journal article supplement (doi:10.3390/molecules28196986), 2023-10-09
Supplement: s1 [file s1]

## Supporting Information

# Investigating the Structural Evolution and Catalytic Activity of *c*-Co/Co<sub>3</sub>Mo Electrocatalysts for Alkaline Hydrogen Evolution Reaction

Long Chen <sup>1,†</sup>, Li-Wen Jiang <sup>1,†</sup> and Jian-Jun Wang <sup>1,2,\*</sup>

<sup>1</sup> State Key Laboratory of Crystal Materials, Shandong University, Jinan 250100, China; 202232804@mail.sdu.edu.cn (L.C.); 201812674@mail.sdu.edu.cn (L.-W.J.)

<sup>2</sup> Shenzhen Research Institute, Shandong University, Shenzhen 518057, China

\* Correspondence: wangjianjun@sdu.edu.cn

† These authors contributed equally to this work.

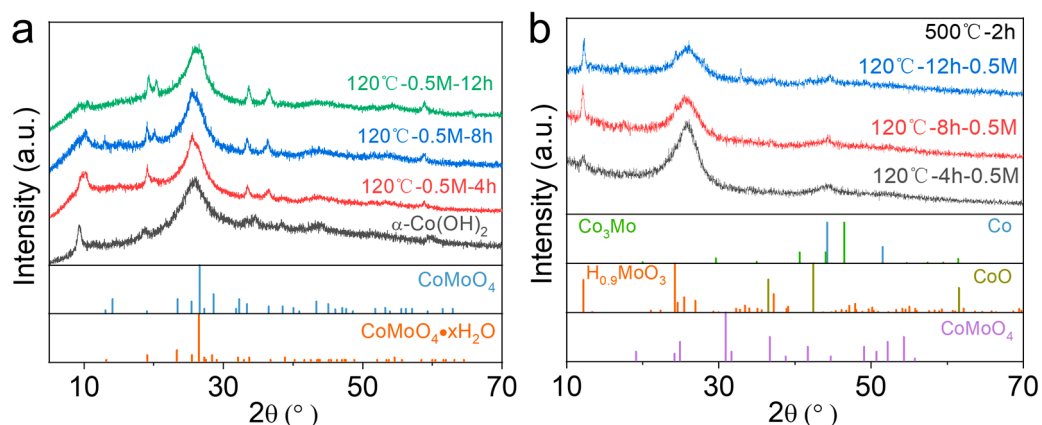

Figure S1. (a) The XRD patterns of sample-120°C-4h-0.5M, sample-120°C-8h-0.5M and sample-120°C-12h-0.5M. (b) The corresponding XRD patterns of catalysts annealed at 500 °C for 2 h in a mixed hydrogen-argon flow.

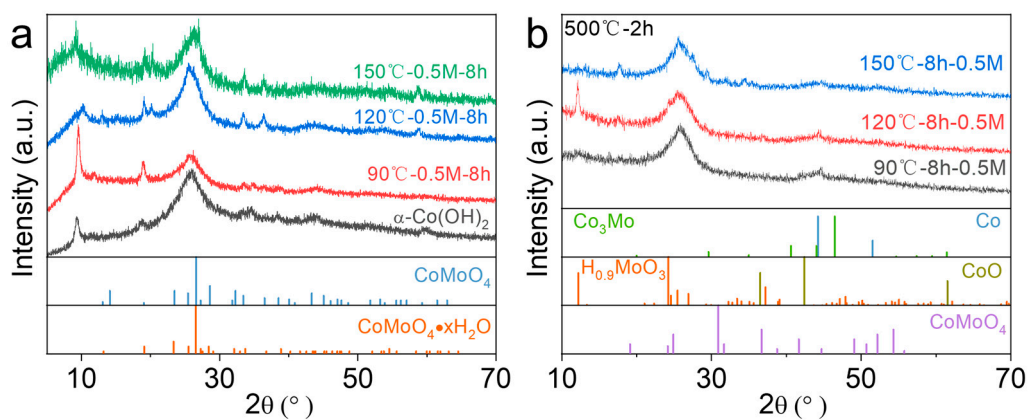

Figure S2. (a) The XRD patterns of sample-90°C-8h-0.5M, sample-120°C-8h-0.5M and sample-150°C-8h-0.5M. (b) The corresponding XRD patterns of catalysts annealed at 500 °C for 2 h in a mixed hydrogen-argon flow.

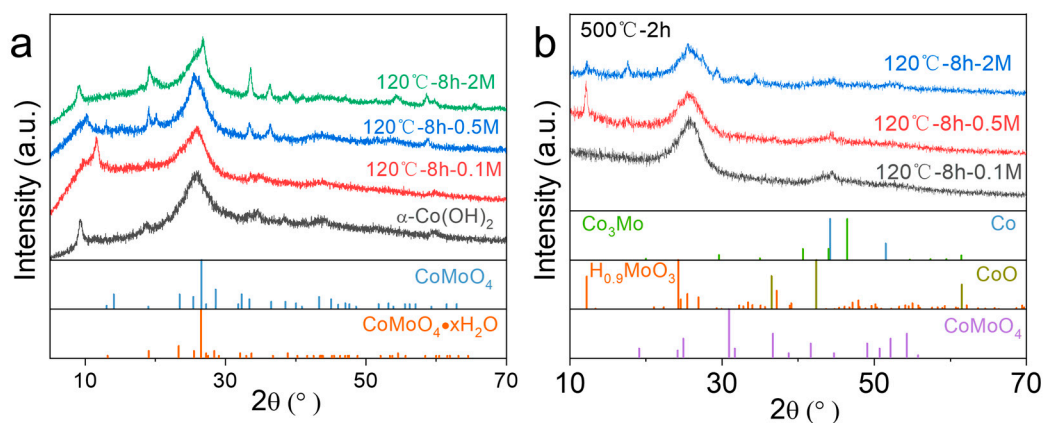

Figure S3. (a) The XRD patterns of sample-120°C-8h-0.1M, sample-120°C-8h-0.5M and sample-120°C-8h-2M. (b) The corresponding XRD patterns of catalysts annealed at 500 °C for 2 h in a mixed hydrogen-argon flow.

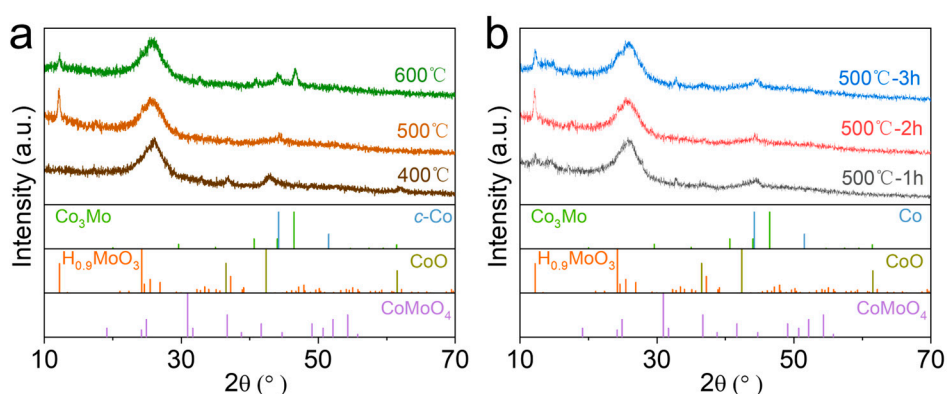

Figure S4. The XRD patterns of  $c\text{-Co/Co}_3\text{Mo}$  catalysts obtained by annealing sample-120°C-8h-0.5M at (a) 400°C, 500°C, and 600 °C for 2 h in a mixed hydrogen-argon flow, respectively; (b) 500 °C for 1, 2, and 3h in a mixed hydrogen-argon flow, respectively.

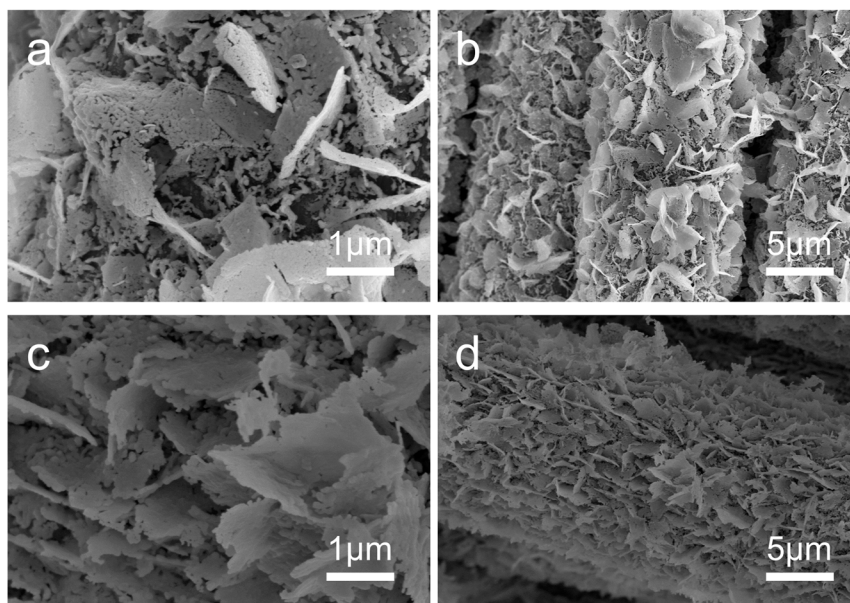

Figure S5. SEM images of catalysts obtained by annealing (a, b) sample-90°C-8h-0.5M and (c, d) sample-150°C-8h-0.5M at 500 °C for 2 h in a mixed hydrogen-argon flow, respectively.

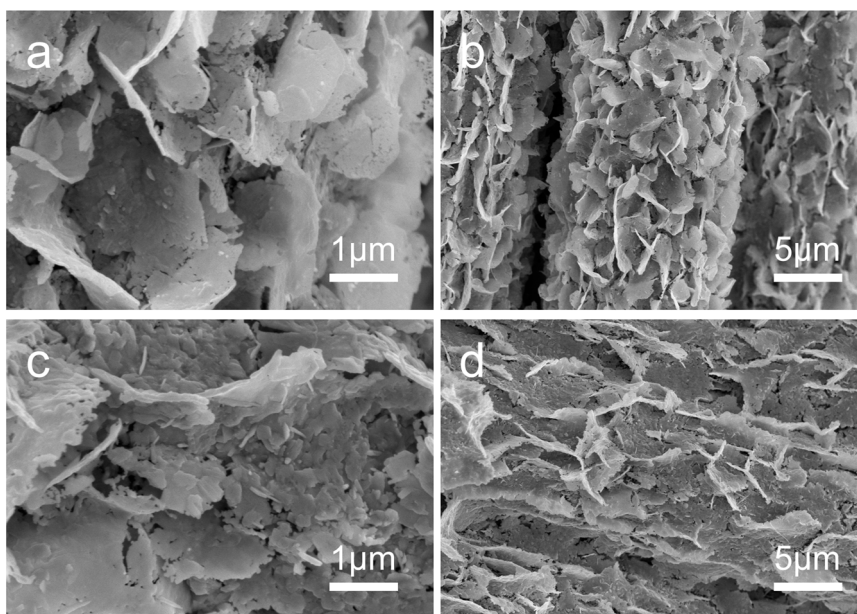

Figure S6. SEM images of catalysts obtained by annealing (a, b) sample-120°C-4h-0.5M and (c, d) sample-120°C-12h-0.5M at 500 °C for 2 h in a mixed hydrogen-argon flow, respectively.



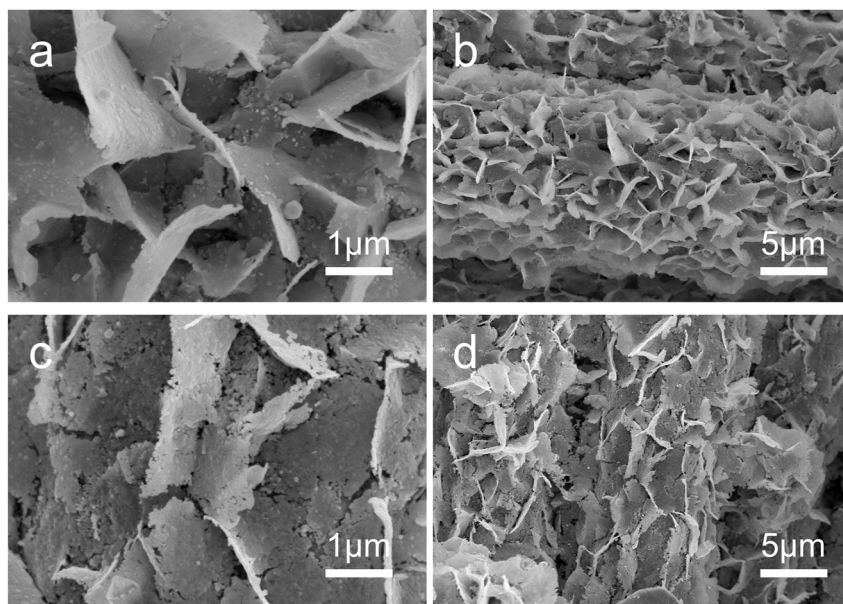

Figure S7. SEM images of catalysts obtained by annealing sample-120°C-8h-0.5M at (a, b) 400 °C and (c, d) 600 °C for 2 h in a mixed hydrogen-argon flow, respectively.

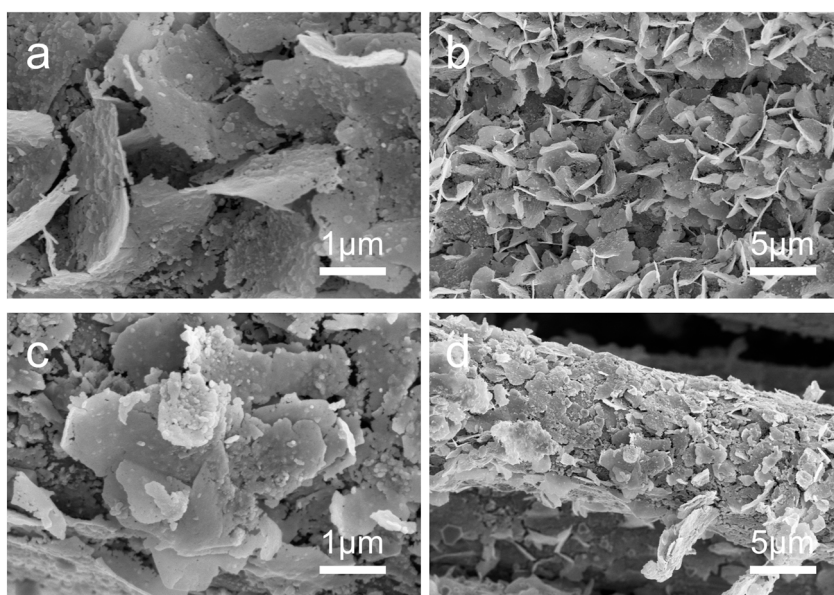

Figure S8. SEM images of catalysts obtained by annealing sample-120°C-8h-0.5M at 500 °C for (a, b) 1 h and (c, d) 3 h in a mixed hydrogen-argon flow, respectively.

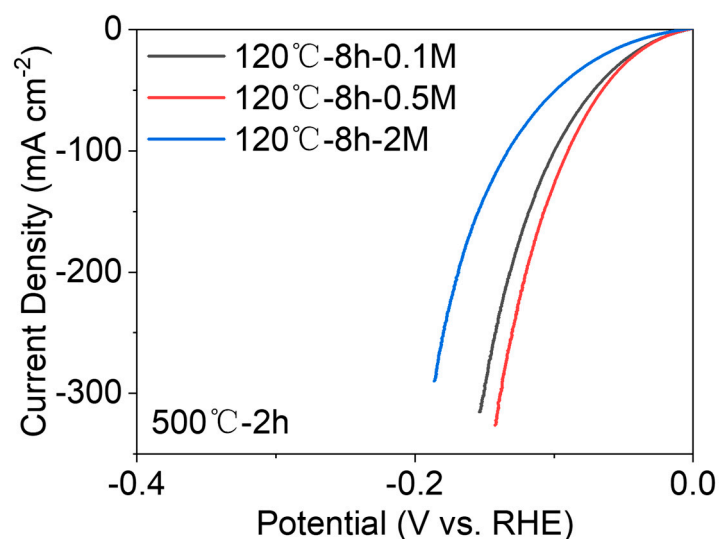

Figure S9. LSV curves of catalysts obtained by annealing sample-120°C-8h-0.1M, sample-120°C-8h-0.5M, and sample-120°C-8h-2M at 500 °C for 2 h in a mixed hydrogen-argon flow, respectively.

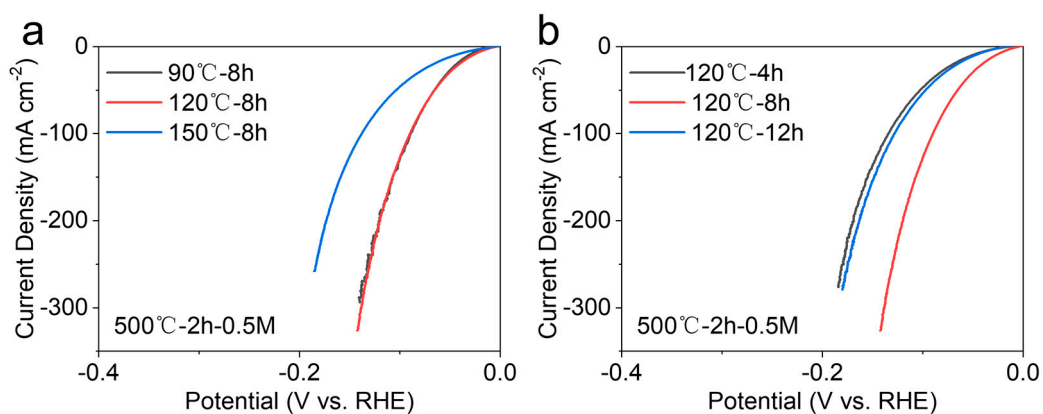

Figure S10. (a) LSV curves of catalysts obtained by annealing sample-90°C-8h-0.5M, sample-120°C-8h-0.5M, and sample-150°C-8h-0.5M at 500 °C for 2 h in a mixed hydrogen-argon flow, respectively. (b) LSV curves of catalysts obtained by annealing sample-120°C-4h-0.5M, sample-120°C-8h-0.5M, and sample-120°C-12h-0.5M at 500 °C for 2 h in a mixed hydrogen-argon flow, respectively.

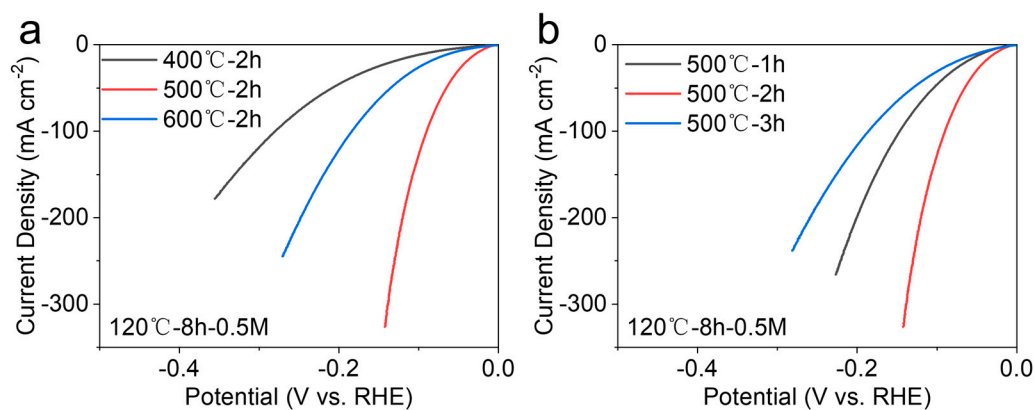

Figure S11. (a) LSV curves of catalysts obtained by annealing sample-120°C-8h-0.5M at 400, 500, and 600 °C for 2 h in a mixed hydrogen-argon flow, respectively. (b) LSV curves of catalysts obtained by annealing sample-120°C-8h-0.5M at 500 °C for 1, 2, and 3 h in a mixed hydrogen-argon flow, respectively.

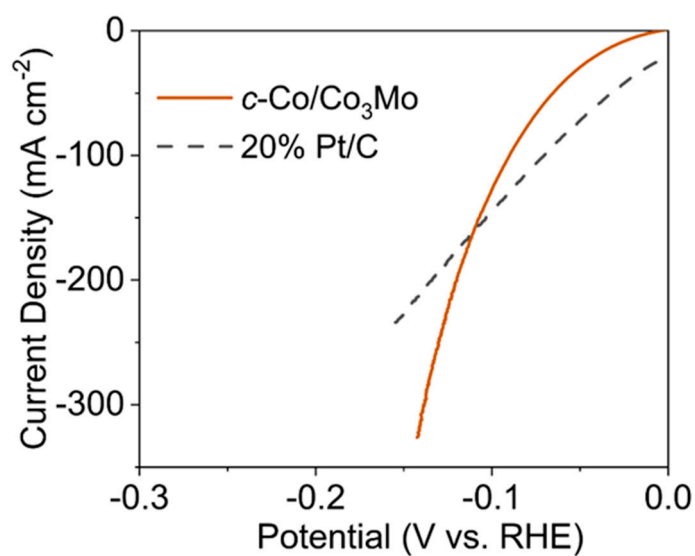

Figure S12. LSV curve of 20% Pt/C and *c*-Co/Co<sub>3</sub>Mo electrodes.

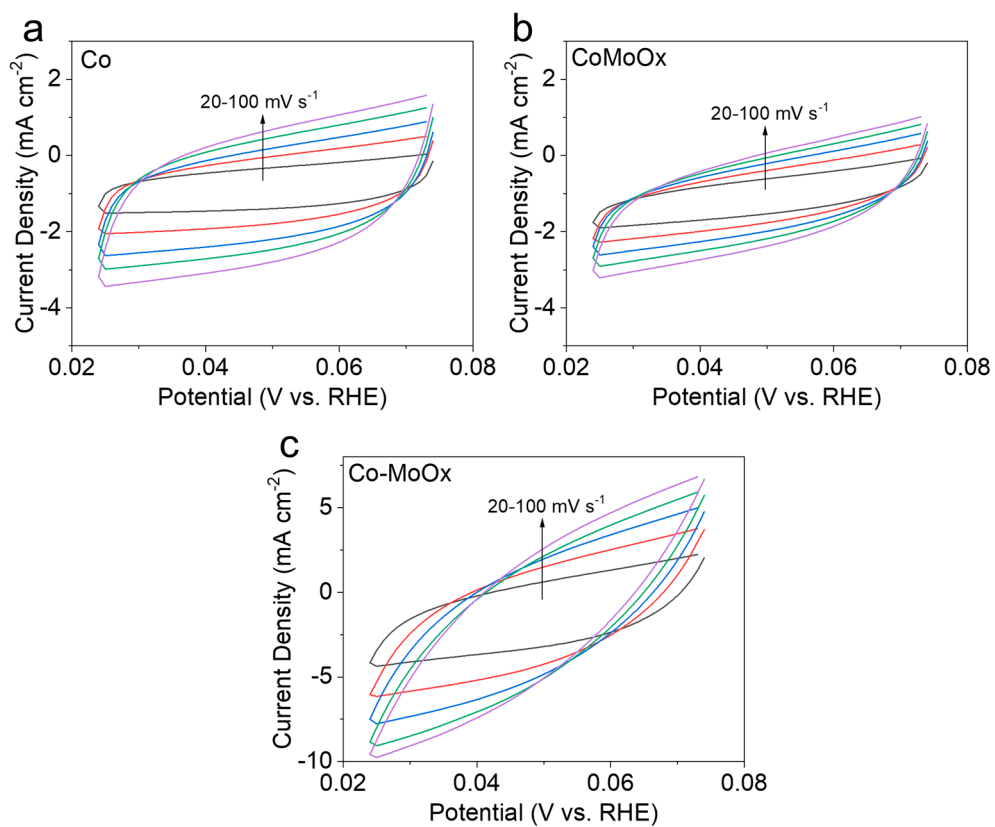

Figure S13. CV curves of (a) *c*-Co, (b) *c*-Co/Co<sub>3</sub>Mo, and (c) Co<sub>3</sub>O<sub>4</sub>/CoMoO<sub>4</sub> at varied scan rates.

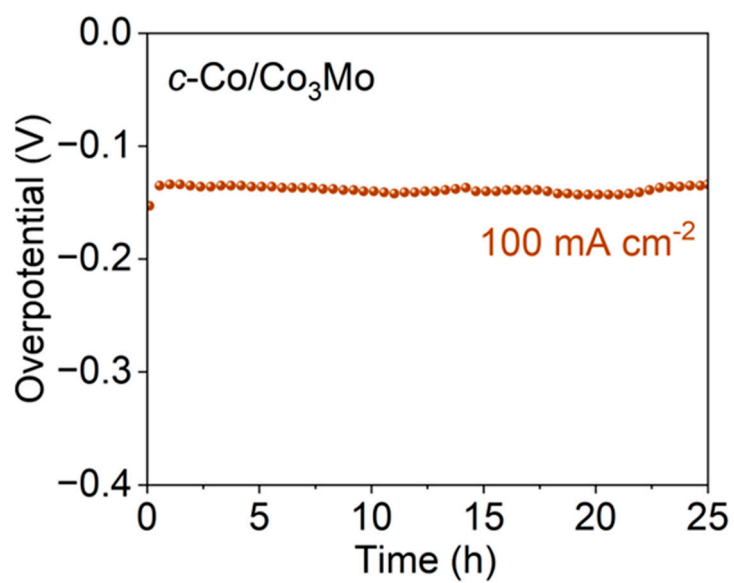

Figure S14. Chronopotentiometry curve of *c*-Co/Co<sub>3</sub>Mo at a constant current density of 100  $\text{mA cm}^{-2}$ .

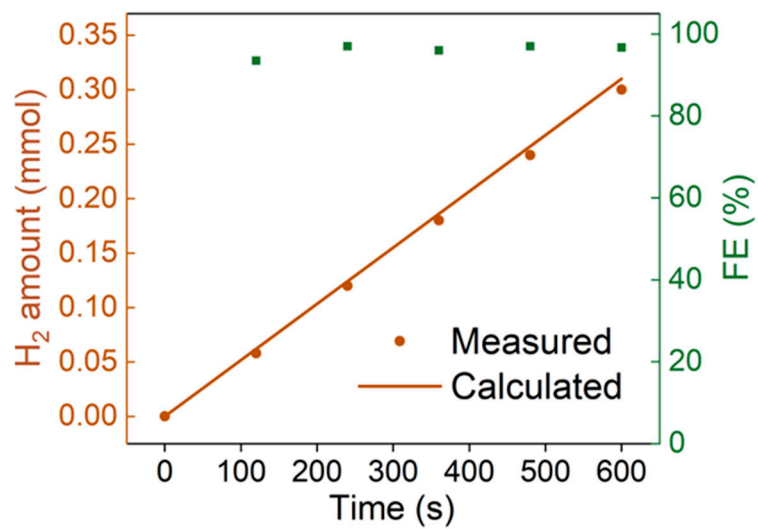

Figure S15. Faraday efficiency of *c*-Co/Co<sub>3</sub>Mo at 1 M KOH.

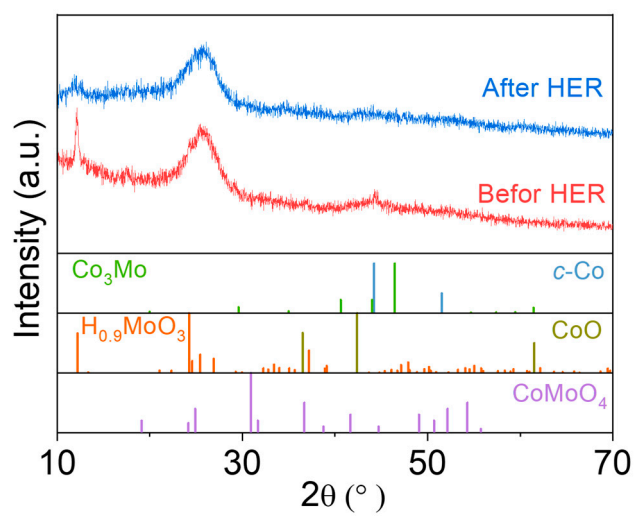

Figure S16. XRD patterns of *c*-Co/Co<sub>3</sub>Mo before and after HER test.

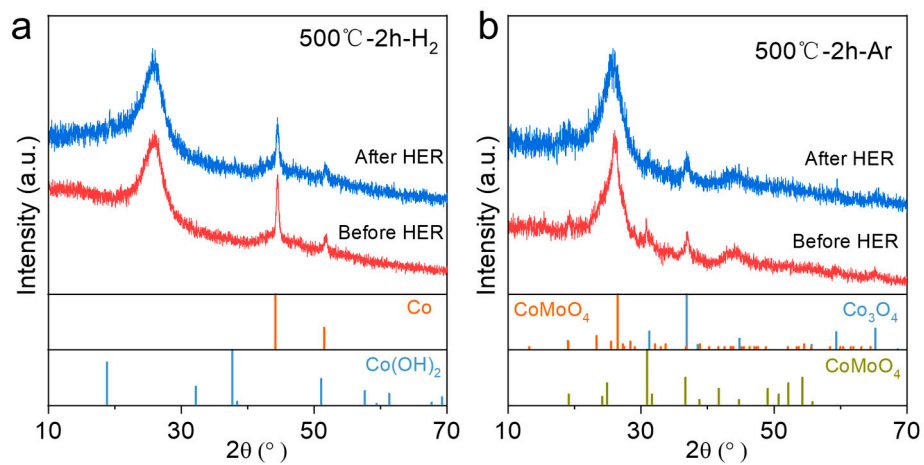

Figure S17. XRD patterns of (a) *c*-Co and (b)  $\text{Co}_3\text{O}_4/\text{CoMoO}_4$  before and after HER test.

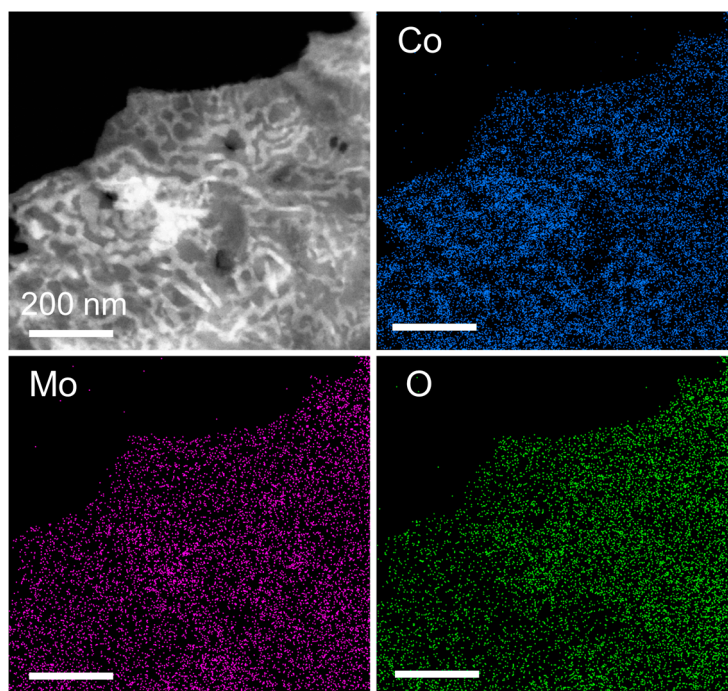

Figure S18. EDX elemental mapping images of *c*-Co/ $\text{Co}_3\text{Mo}$  after HER test.

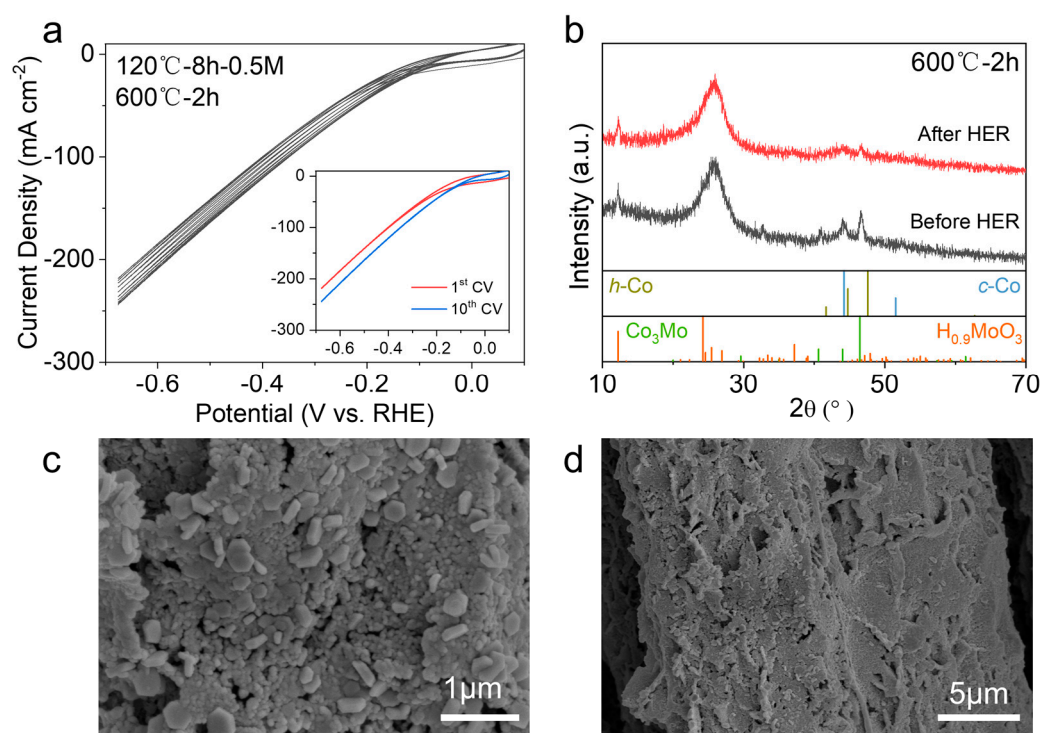

Figure S19. (a) Evolutive CV curves from the 1<sup>st</sup> to the 10<sup>th</sup> CV in 1 M KOH at 50 mV s<sup>-1</sup> between 0.124 and -0.676 V (vs RHE), (b) XRD patterns, (c, d) The SEM image after HER test was obtained when the sample was annealed at 120°C-8h-0.5M, 600°C, in a hydrogen-argon mixed flow for 2 h.

Table S1. The results of EDX for the c-Co/Co<sub>3</sub>Mo catalyst.

| Element | Wt %  | Atomic % |
|---------|-------|----------|
| O       | 24.30 | 56.01    |
| Co      | 61.76 | 38.64    |
| Mo      | 13.94 | 5.36     |

Table S2. The comparison of HER performance for c-Co/Co<sub>3</sub>Mo with some related reports.

| Catalyst                                  | Overpotential at 10 mA cm <sup>-2</sup> (mV) | References                                                                |
|-------------------------------------------|----------------------------------------------|---------------------------------------------------------------------------|
| c-Co/Co <sub>3</sub> Mo                   | 28                                           | This work                                                                 |
| RCMO@NF                                   | 68                                           | <i>ACS Appl. Mater. Interfaces</i> , <b>2019</b> , <i>11</i> , 9002– 9010 |
| Co <sub>3</sub> Mo/CoMoO <sub>3</sub> NPS | 34                                           | <i>J. Mater. Sci. Technol.</i> , <b>2023</b> , <i>137</i> , 184-192       |
| NF/CoNiMo-500                             | 34                                           | <i>Chem. Eng. J.</i> , <b>2022</b> , <i>450</i> , 138206                  |
| PVP- MoS <sub>2</sub> -RGO                | 66                                           | <i>Small</i> , <b>2018</b> , <i>14</i> , e1803361                         |
| CoP@3DOM-FeP                              | 67.2                                         | <i>J. Mater. Chem. A</i> , <b>2021</b> , <i>9</i> , 23574-23581           |
| Mn <sub>2</sub> P-MnP/PNC                 | 63                                           | <i>Chem. Eng. J.</i> , <b>2023</b> , <i>469</i> , 143879                  |
| PdSe <sub>2</sub>                         | 138                                          | <i>Adv. Funct. Mater.</i> , <b>2021</b> , <i>31</i> , 2102321             |

Table S3. TOF for c-Co/Co<sub>3</sub>Mo at overpotentials of 100, 150, and 200 mV for HER.

| Overpotential       | 100 mV | 150 mV | 200 mV |
|---------------------|--------|--------|--------|
| TOF s <sup>-1</sup> | 0.052  | 0.14   | 0.24   |
